# Supplementary material
Source: Springer Nature journal article supplement (https://www.springermedizin.de/resource/supplementary/12913_2013_3205_MOESM1_ESM.pdf/9532690)
Supplement: MOESM1 [file 9532690]

**Additional file 1**

**Table 1 Table showing factors and items which contribute to each factor in each clinical area**

| Factor                                                                                                                                                                                                                                                                                                                                                                                                                                                                                                                                                                                                                                                                                                                                                                                                                                                                                                                                                                                                                                     | Indicators                                                                                                                                                                                                                                                                                                                                                                                                                                                                 |             |          |             |          |                     |         |           |  |
|--------------------------------------------------------------------------------------------------------------------------------------------------------------------------------------------------------------------------------------------------------------------------------------------------------------------------------------------------------------------------------------------------------------------------------------------------------------------------------------------------------------------------------------------------------------------------------------------------------------------------------------------------------------------------------------------------------------------------------------------------------------------------------------------------------------------------------------------------------------------------------------------------------------------------------------------------------------------------------------------------------------------------------------------|----------------------------------------------------------------------------------------------------------------------------------------------------------------------------------------------------------------------------------------------------------------------------------------------------------------------------------------------------------------------------------------------------------------------------------------------------------------------------|-------------|----------|-------------|----------|---------------------|---------|-----------|--|
| <b>Paediatric Ward (PW)</b>                                                                                                                                                                                                                                                                                                                                                                                                                                                                                                                                                                                                                                                                                                                                                                                                                                                                                                                                                                                                                |                                                                                                                                                                                                                                                                                                                                                                                                                                                                            |             |          |             |          |                     |         |           |  |
| Essential drugs/emergency resources                                                                                                                                                                                                                                                                                                                                                                                                                                                                                                                                                                                                                                                                                                                                                                                                                                                                                                                                                                                                        | <p><b>Consider out of ten most recent occasions the:-</b></p> <p>*Availability of oxygen when needed</p>                                                                                                                                                                                                                                                                                                                                                                   |             |          |             |          |                     |         |           |  |
|                                                                                                                                                                                                                                                                                                                                                                                                                                                                                                                                                                                                                                                                                                                                                                                                                                                                                                                                                                                                                                            | <p><b>Consider out of ten most recent occasions the number of patients getting the drug from ward stock / hospital pharmacy as soon as required, without delay or paying for it before it is administered :-</b></p> <table border="0" style="width: 100%;"> <tr> <td>*Penicillin</td> <td>*Quinine</td> </tr> <tr> <td>*Gentamicin</td> <td>*Septrin</td> </tr> <tr> <td>*IV Chloramphenicol</td> <td>*Amoxil</td> </tr> <tr> <td>*Diazepam</td> <td></td> </tr> </table> | *Penicillin | *Quinine | *Gentamicin | *Septrin | *IV Chloramphenicol | *Amoxil | *Diazepam |  |
|                                                                                                                                                                                                                                                                                                                                                                                                                                                                                                                                                                                                                                                                                                                                                                                                                                                                                                                                                                                                                                            | *Penicillin                                                                                                                                                                                                                                                                                                                                                                                                                                                                | *Quinine    |          |             |          |                     |         |           |  |
| *Gentamicin                                                                                                                                                                                                                                                                                                                                                                                                                                                                                                                                                                                                                                                                                                                                                                                                                                                                                                                                                                                                                                | *Septrin                                                                                                                                                                                                                                                                                                                                                                                                                                                                   |             |          |             |          |                     |         |           |  |
| *IV Chloramphenicol                                                                                                                                                                                                                                                                                                                                                                                                                                                                                                                                                                                                                                                                                                                                                                                                                                                                                                                                                                                                                        | *Amoxil                                                                                                                                                                                                                                                                                                                                                                                                                                                                    |             |          |             |          |                     |         |           |  |
| *Diazepam                                                                                                                                                                                                                                                                                                                                                                                                                                                                                                                                                                                                                                                                                                                                                                                                                                                                                                                                                                                                                                  |                                                                                                                                                                                                                                                                                                                                                                                                                                                                            |             |          |             |          |                     |         |           |  |
| <p><b>Consider out of ten most recent occasions the availability of:-</b></p> <p>*Bolus glucose – number of times drug is immediately available to treat hypoglycaemia (within 2 minutes)</p> <p>*FS Ringers / N/Saline – number of patients getting the fluids from ward stock / hospital pharmacy as soon as required, without delay and before paying for the fluid cannula or giving set.</p> <p>*Other iv fluids – number of patients getting the fluids from ward stock / hospital pharmacy as soon as required, without delay and before paying for the fluid cannula or giving set.</p> <p>*ORS – number of patients getting the ORS from ward stock / hospital pharmacy as soon as required on admission without delay or before paying for it.</p> <p>*Blood transfusion – number of children with severe anaemia getting blood direct from blood bank before finding a donor or paying a fee.</p> <p>*Blood transfusion – number of children with severe anaemia starting blood transfusion within 4 hours of prescription.</p> |                                                                                                                                                                                                                                                                                                                                                                                                                                                                            |             |          |             |          |                     |         |           |  |
| Nutrition and supportive care                                                                                                                                                                                                                                                                                                                                                                                                                                                                                                                                                                                                                                                                                                                                                                                                                                                                                                                                                                                                              | <p><b>Consider out of ten most recent occasions the:-</b></p> <p>*Ability to provide oxygen at a flow of 2l/min to each individual patient.</p>                                                                                                                                                                                                                                                                                                                            |             |          |             |          |                     |         |           |  |

|                                                |                                                                                                                                                                                                                                                                                                                                                                                                                                                                                                                                                                                                                                                                                                                             |
|------------------------------------------------|-----------------------------------------------------------------------------------------------------------------------------------------------------------------------------------------------------------------------------------------------------------------------------------------------------------------------------------------------------------------------------------------------------------------------------------------------------------------------------------------------------------------------------------------------------------------------------------------------------------------------------------------------------------------------------------------------------------------------------|
|                                                | <p><b>Consider out of ten most recent occasions the adequacy of:-</b></p> <ul style="list-style-type: none"> <li>*F75 / F100/Milk feeds - number of malnourished children getting correct amount feed from ward stock / nutritionists within 4 hours of admission.</li> <li>*Night feeds - number of malnourished children getting 3 hourly night feeds as recommended.</li> <li>*Night feeds - number of babies being ngt fed getting 3 hourly night feeds as recommended.</li> <li>*Frequent solid transition feeds - number of malnourished children getting 4 or 5 meals a day during recovery phase.</li> <li>*Monitoring feed intake - number of malnourished children with an accurate feed intake chart.</li> </ul> |
| Cleanliness                                    | <p><b>Consider out of ten most recent occasions the availability of:-</b></p> <ul style="list-style-type: none"> <li>* Water from taps to wash your hands between patients</li> <li>* Soap / disinfectant to clean your hands between patients</li> <li>* Water from taps for mothers / caretakers to wash their hands after care-giving or eating</li> <li>* Soap / disinfectant for mothers / caretakers to wash their hands after care-giving or eating</li> </ul>                                                                                                                                                                                                                                                       |
|                                                | <p><b>Consider out of ten most recent occasions:-</b></p> <ul style="list-style-type: none"> <li>* Patients bathing / washing area observed to be appropriately clean</li> <li>* Patients toilets observed to be appropriately clean</li> <li>* Ability to keep diarrhoea cases separately – not mixed with other patients</li> <li>* Ability to isolate highly infectious cases (measles, chickenpox etc)</li> <li>* Disinfectant used to clean spills of blood, stool or urine</li> </ul>                                                                                                                                                                                                                                 |
| Second-line drugs                              | <p><b>Consider out of ten most recent occasions the number of patients getting the drug from ward stock / hospital pharmacy as soon as required, without delay or paying for it before it is administered :-</b></p> <ul style="list-style-type: none"> <li>*Coartem</li> <li>* Cloxacillin / Flucloxacillin</li> <li>* Erythromicin</li> <li>* Ceftriaxone / cefotaxime</li> <li>* Phenobarbitone Injection</li> </ul>                                                                                                                                                                                                                                                                                                     |
| <b>Maternity ward with newborn nursery(NN)</b> |                                                                                                                                                                                                                                                                                                                                                                                                                                                                                                                                                                                                                                                                                                                             |
| Supportive care                                | <p><b>Consider out of ten most recent occasions the availability of:-</b></p> <ul style="list-style-type: none"> <li>* Phototherapy device when required for each user</li> <li>* Individual cots when required to prevent sharing (except twins)</li> </ul>                                                                                                                                                                                                                                                                                                                                                                                                                                                                |

|                                        |                                                                                                                                                                                                                                                                                                                                                                                                                                                                                                                                                                                                                                                                                                                                                                                                                                                                                                                                                                                                                                                                                                                                                            |
|----------------------------------------|------------------------------------------------------------------------------------------------------------------------------------------------------------------------------------------------------------------------------------------------------------------------------------------------------------------------------------------------------------------------------------------------------------------------------------------------------------------------------------------------------------------------------------------------------------------------------------------------------------------------------------------------------------------------------------------------------------------------------------------------------------------------------------------------------------------------------------------------------------------------------------------------------------------------------------------------------------------------------------------------------------------------------------------------------------------------------------------------------------------------------------------------------------|
|                                        | <p><b>Consider out of ten most recent occasions the:-</b></p> <ul style="list-style-type: none"> <li>* Availability of Vitamin K – number of babies receiving routine stat dose.</li> <li>* Availability of oxygen whenever needed</li> <li>* Ability to provide oxygen at a flow of 1l/min to each individual patient</li> </ul> <p><b>Consider out of ten most recent occasions the number of patients getting the drug from ward stock / hospital pharmacy as soon as required , without delay or paying for it before it is administered:-</b></p> <ul style="list-style-type: none"> <li>* Phenobarbitone Injection</li> </ul> <p><b>Consider out of ten most recent occasions the:-</b></p> <ul style="list-style-type: none"> <li>* Number of babies with mothers who are unable to provide adequate EBM (through maternal death, maternal illness, or premature delivery) who spend 3 or more days receiving inadequate feed volumes</li> <li>* Number of babies being ngt fed getting 3 hourly night feeds as recommended (night feeds).</li> <li>* Number of ngt fed babies with an accurate feed intake chart(monitored feed intake)</li> </ul> |
| Common Drugs                           | <p><b>Consider out of ten most recent occasions the number of patients getting the drug from ward stock / hospital pharmacy as soon as required , without delay or paying for it before it is administered:-</b></p> <ul style="list-style-type: none"> <li>* Penicillin</li> <li>* Gentamicin</li> <li>* Cloxacillin / Flucloxacillin</li> <li>* Ceftriaxone / cefotaxime</li> </ul> <p><b>Consider out of ten most recent occasions the availability of:-</b></p> <ul style="list-style-type: none"> <li>* Bolus glucose – number of times drug is immediately available to treat hypoglycaemia (within 2 minutes)</li> </ul>                                                                                                                                                                                                                                                                                                                                                                                                                                                                                                                            |
| Resuscitation and thermal equipment    | <p><b>Consider out of ten most recent occasions the availability of:-</b></p> <ul style="list-style-type: none"> <li>* Warmer for resuscitation in delivery room when required</li> <li>* Incubator or long term warming method when required</li> <li>* Working bag and mask device when required</li> </ul>                                                                                                                                                                                                                                                                                                                                                                                                                                                                                                                                                                                                                                                                                                                                                                                                                                              |
| Cleanliness                            | <p><b>Consider out of ten most recent occasions the availability of:-</b></p> <ul style="list-style-type: none"> <li>* Water from taps to wash your hands between patients</li> <li>* Soap / disinfectant to clean your hands between patients</li> </ul>                                                                                                                                                                                                                                                                                                                                                                                                                                                                                                                                                                                                                                                                                                                                                                                                                                                                                                  |
| Maternal and child health clinic (MCH) |                                                                                                                                                                                                                                                                                                                                                                                                                                                                                                                                                                                                                                                                                                                                                                                                                                                                                                                                                                                                                                                                                                                                                            |

|                            |                                                                                                                                                                                                                                                                                                                                                                                                                                                                                                                                                                                              |
|----------------------------|----------------------------------------------------------------------------------------------------------------------------------------------------------------------------------------------------------------------------------------------------------------------------------------------------------------------------------------------------------------------------------------------------------------------------------------------------------------------------------------------------------------------------------------------------------------------------------------------|
| Hygiene and emergency care | <p><b>Consider out of ten most recent occasions the availability of:-</b></p> <ul style="list-style-type: none"> <li>* Water from taps to wash your hands between patients</li> <li>* Soap / disinfectant to clean your hands between patients</li> <li>* Disinfectant was used to clean spills of blood, stool or urine</li> </ul>                                                                                                                                                                                                                                                          |
|                            | <p><b>Consider out of ten most recent occasions the number of patients getting the drug from ward stock / hospital pharmacy as soon as required , without delay or paying for it before it is administered:-</b></p> <ul style="list-style-type: none"> <li>*Diazepam</li> </ul>                                                                                                                                                                                                                                                                                                             |
|                            | <p><b>Consider out of ten most recent occasions the availability of:-</b></p> <ul style="list-style-type: none"> <li>* Bolus glucose – number of times drug is immediately available to treat hypoglycaemia (within 2 minutes)</li> <li>* Ringers / N/Saline – number of patients getting the fluids from ward stock / hospital pharmacy as soon as required without delay and before paying for the fluid cannula or giving set.</li> <li>* ORS – number of patients getting the ORS from ward stock / hospital pharmacy as soon as required without delay and before paying it.</li> </ul> |
| Drugs                      | <p><b>Consider out of ten most recent occasions the number of patients getting the drug from ward stock / hospital pharmacy as soon as required , without delay or paying for it before it is administered:-</b></p> <ul style="list-style-type: none"> <li>* Coartem</li> <li>* Septrin</li> <li>*Amoxil</li> </ul>                                                                                                                                                                                                                                                                         |
| Oxygen availability        | <p><b>Consider out of ten most recent occasions the:-</b></p> <ul style="list-style-type: none"> <li>* Availability of oxygen whenever needed</li> <li>* Ability to provide oxygen at a flow of 2l/min to each individual patient</li> </ul>                                                                                                                                                                                                                                                                                                                                                 |

Only one item<sup>1</sup> in NN had no factor loading > 0.3 for any single factor resulting in its elimination from aggregated analysis.

<sup>1</sup> Equipment available; Consider out of ten most recent occasions the availability of:- Paediatric iv fluid drip set (with burette) when required
